# Supplementary material for: Electrochemical oxidation of As(iii) on Pd immobilized Pt surface: kinetics and sensing performance
Source: Royal Society of Chemistry journal article supplement (doi:10.1039/c7ra12576c), 2018-01-01
Supplement: c7ra12576c1.pdf [file c7ra12576c1.pdf]

Electronic Supplementary Material (ESI) for Analyst.  
This journal is © The Royal Society of Chemistry 20XX

## Electrochemical oxidation of As(III) on Pd immobilized Pt surface: Kinetics and sensing performance

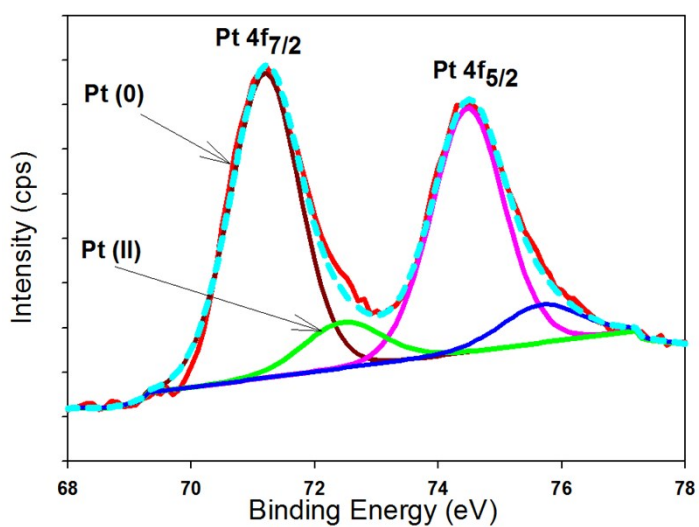

Fig.S1. XPS fine scan spectra of Pt particle (before Pd deposition)

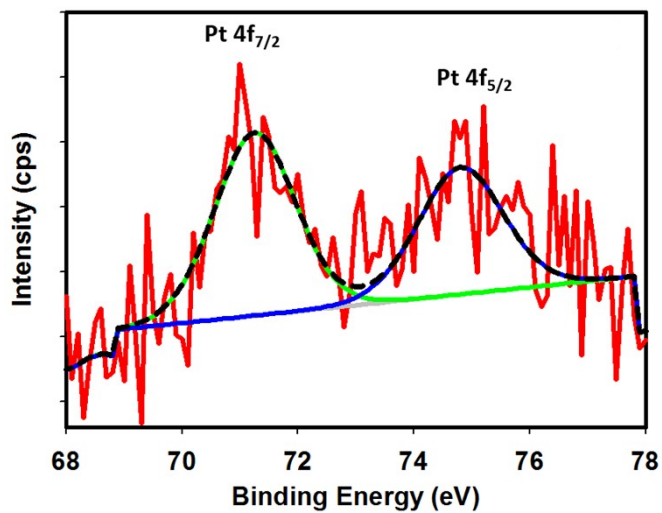

Fig.S2. XPS fine scan spectra of Pt particle (after Pd deposition as adlayers).

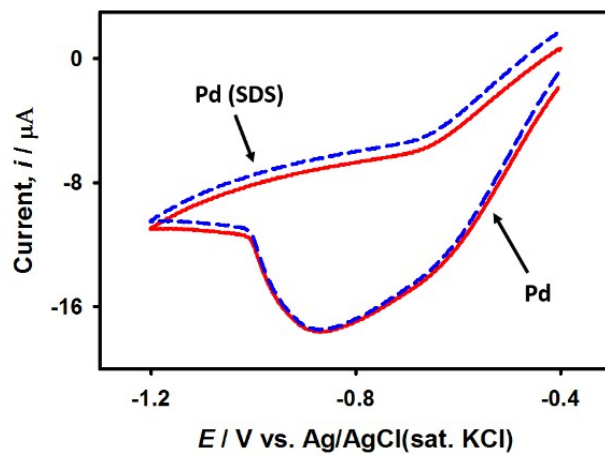

Fig.S3. Electrochemical deposition of Pd on Pt in presence (dotted line) and absence (solid line) of SDS molecules in 0.01 M  $\text{Pd}(\text{NO}_3)_2$ , scan rate at  $100 \text{ mV s}^{-1}$ .

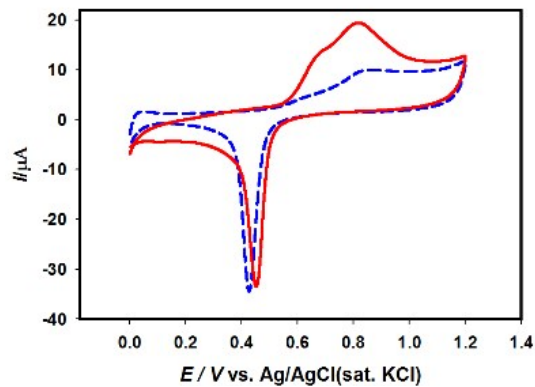

**Fig. S4. CVs of Pd in 0.1 M  $\text{H}_2\text{SO}_4$  ( $50.0 \text{ mVs}^{-1}$ ). (Dotted line blank and Solid line 0.25 mM  $\text{NaAsO}_2$ ). Electrode diameter: 3.0 mm in diameter.**
